# Supplementary material for: Room-temperature growth of fluorapatite/CaCO3heterogeneous structured composites inspired by human tooth
Source: Royal Society of Chemistry journal article supplement (doi:10.1039/d2ra00374k), 2022-01-01
Supplement: d2ra00374k1.pdf [file d2ra00374k1.pdf]

### Supporting information

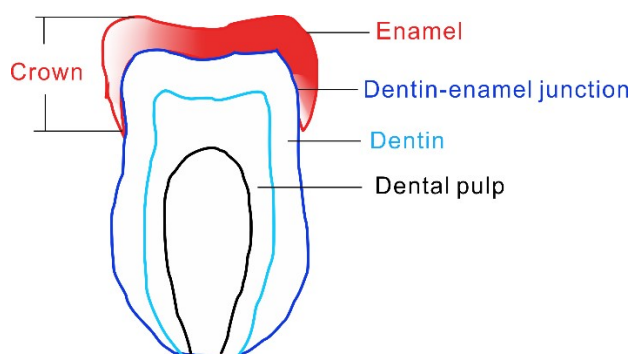

**Fig. S1** The detailed sketch of human tooth.

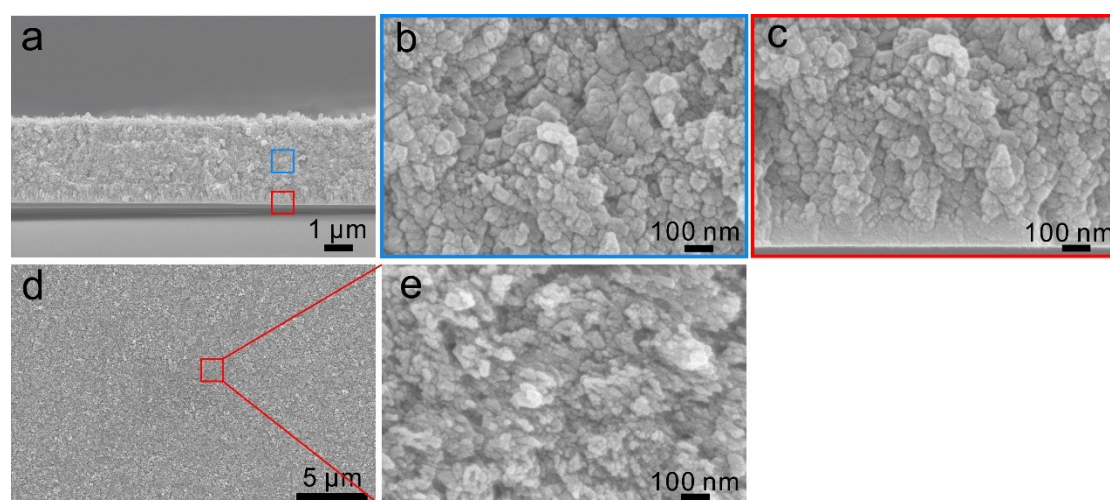

**Fig. S2.** a-c) Cross-sectional SEM images of CaCO<sub>3</sub> layers and the magnified cross-sectional FESEM images show the morphological features. d-e) Plane SEM images of CaCO<sub>3</sub> layers.

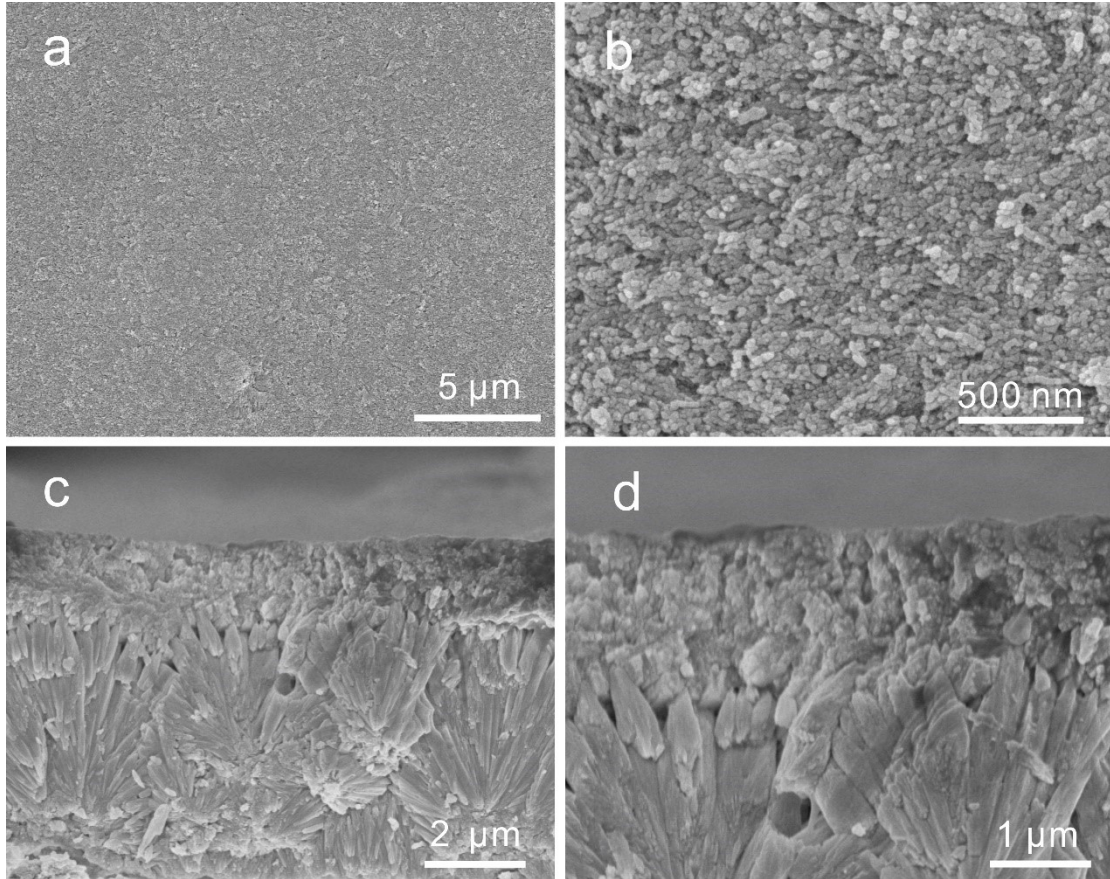

**Fig. S3.** The microstructure of CaCO<sub>3</sub>/FAP heterogeneous structured composites. a-b) The plane SEM images of CaCO<sub>3</sub>/FAP heterogeneous structured composites. c-d) The cross-section SEM images of CaCO<sub>3</sub>/FAP heterogeneous structured composites.

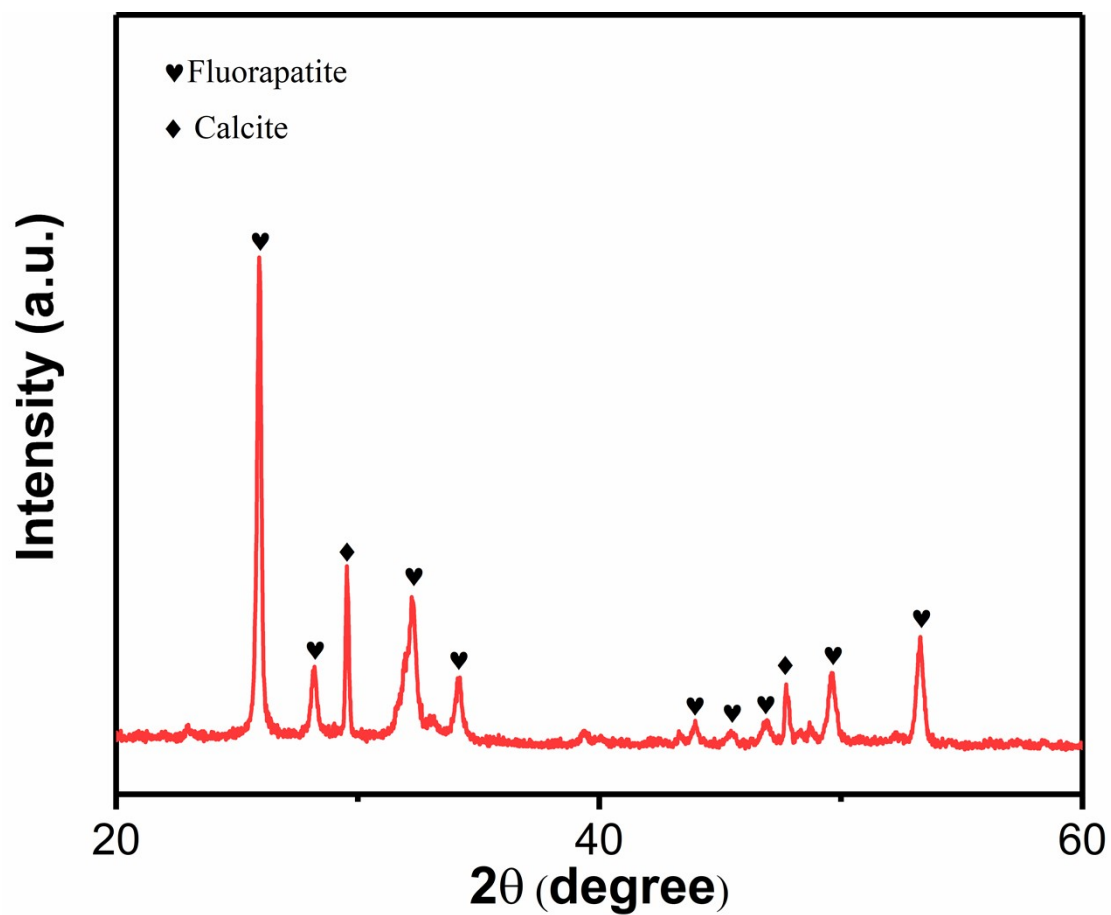

Fig. S4. XRD patterns of FAP/CaCO<sub>3</sub> heterogeneous structured composites.

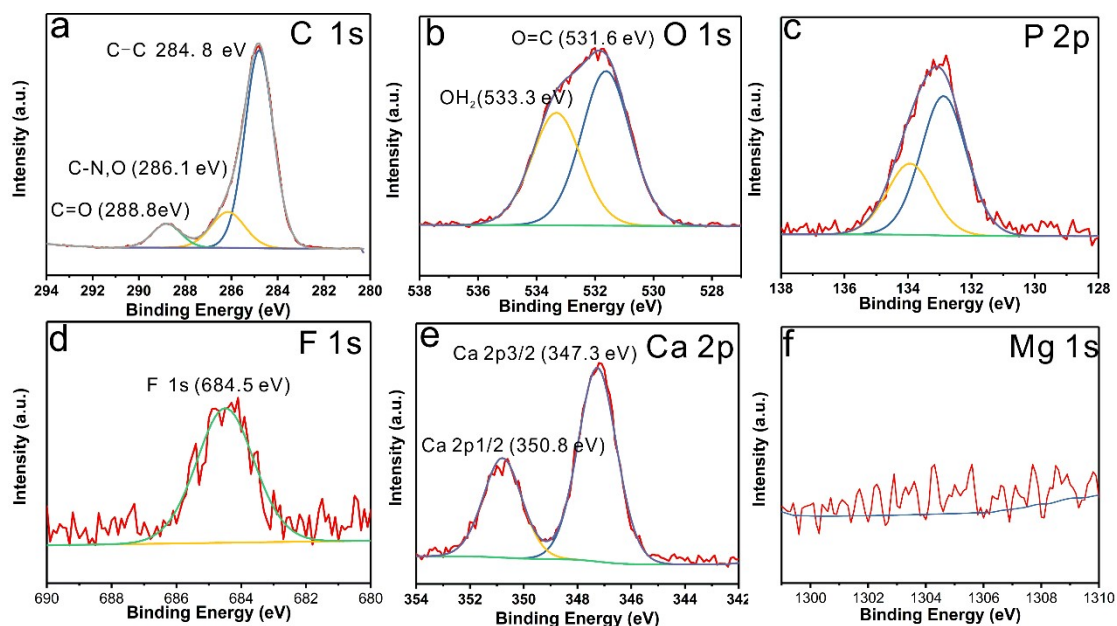

**Fig. S5.** High-resolution XPS profiles of the FAP/CaCO<sub>3</sub> heterogeneous structured composites: a) C 1s, b) O 1s c) P 2p, d) F 1s, e) Ca 2p and f) Mg 1s.

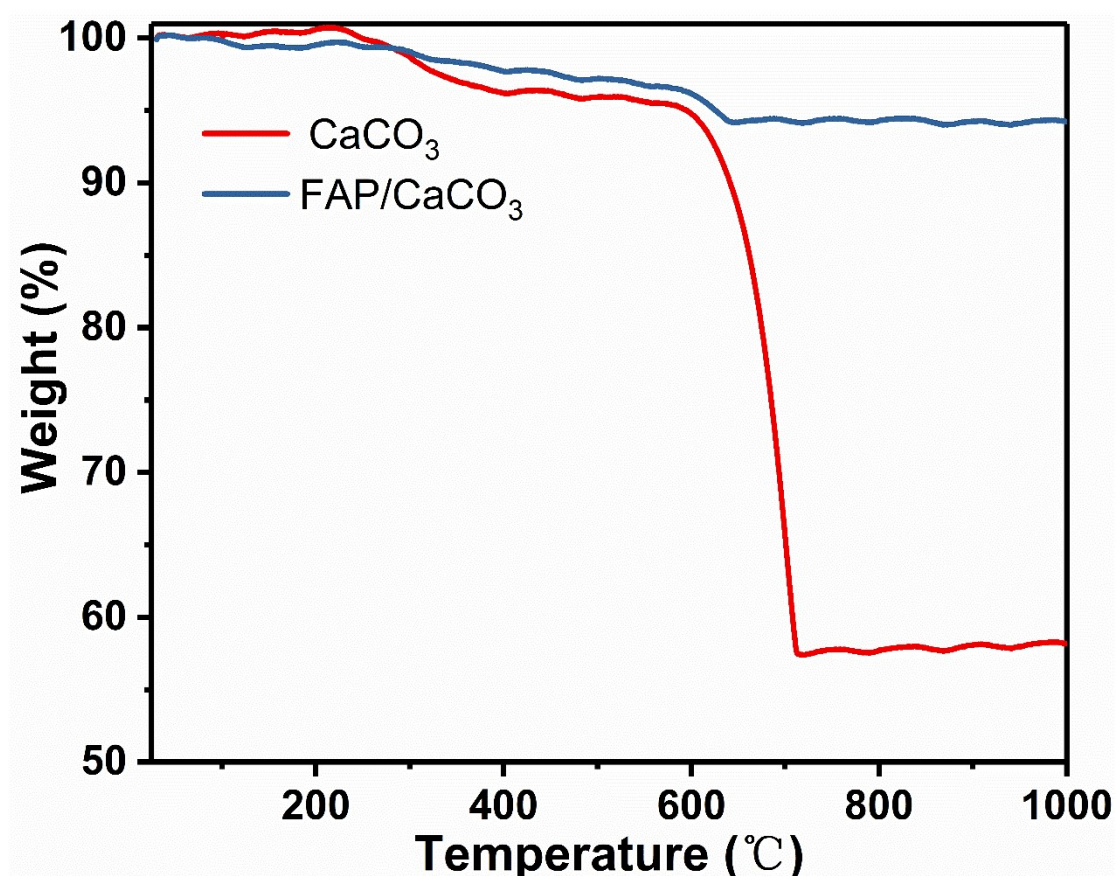

**Fig. S6.** TGA data for the synthetic FAP/CaCO<sub>3</sub> heterogeneous structured composites and the CaCO<sub>3</sub> layer.

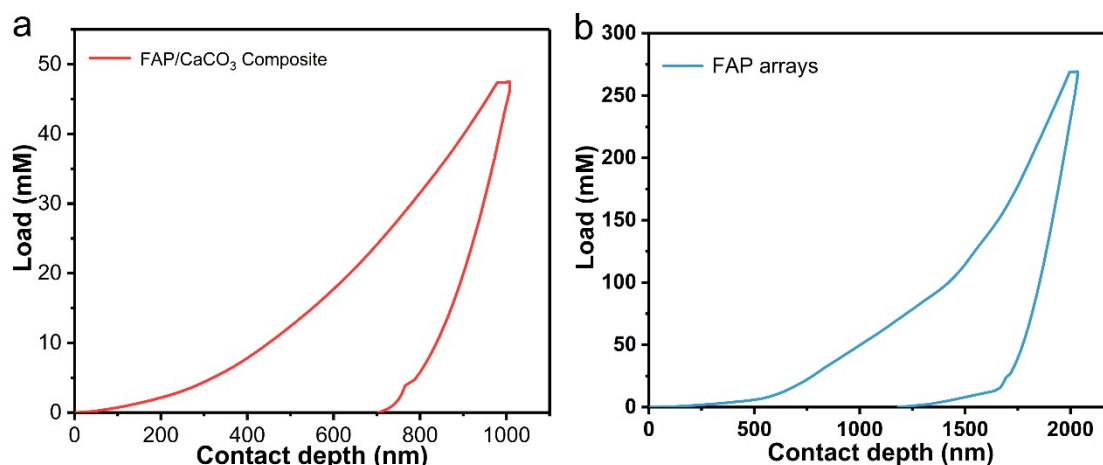

**Fig. S7.** Load–displacement curves for the FAP/CaCO<sub>3</sub> heterogeneous structured composites and FAP arrays.

**Table S1.** Compared with the preparation methods of calcium phosphate and calcium carbonate array materials reported in literature.

| Literature                                                                                                                                               | Synthesis method                                                                                                                                                                       | Mechanical properties                                |
|----------------------------------------------------------------------------------------------------------------------------------------------------------|----------------------------------------------------------------------------------------------------------------------------------------------------------------------------------------|------------------------------------------------------|
| Preparation of Calcite and Aragonite Complex Layer Materials Inspired from Biomineralization. <i>Crystal Growth &amp; Design</i> , 2009 <sup>[1]</sup> . | large-area aragonite film is deposited onto a calcite film in the presence of magnesium ion to biomimetically construct an aragonite-calcite complex structure                         | --                                                   |
| Bioinspired enamel-like oriented minerals on general surfaces: towards improved mechanical properties. <i>J. Mater. Chem. B</i> , 2019 <sup>[2]</sup> .  | developed a biomimetic, anodic alumina oxide (AAO)-assisted, double-layered gel system to fabricate well-oriented HAP crystals on a variety of substrates                              | elastic modulus of 52 GPa and hardness of 0.73 GPa   |
| Artificial enamel induced by phase transformation of amorphous nanoparticles. <i>Scientific Reports</i> , 2017 <sup>[3]</sup> .                          | synthesized an enamel architecture comprising oriented HAP nanorods via geometrical selection induced by reactive amorphous nanoparticles and the corresponding phase transformations. | elastic modulus of 63.4 GPa and hardness of 2.87 GPa |

|                                                                                                                                                                                            |                                                                                                                                                             |                                                      |
|--------------------------------------------------------------------------------------------------------------------------------------------------------------------------------------------|-------------------------------------------------------------------------------------------------------------------------------------------------------------|------------------------------------------------------|
| Solution-Air Interface Synthesis and Growth Mechanism of Tooth Enamel-like Hydroxyapatite/Chondroitin Sulfate Films. <i>Crystal Growth &amp; Design</i> , 2012 <sup>[4]</sup> .            | Fabricate a largescale translucent hydroxyapatite (HAP) and chondroitin sulfate (ChS) composite films by a unique solution-air interface method.            | --                                                   |
| Bioprocess-Inspired Room-Temperature Synthesis of Enamel-like Fluorapatite/Polymer Nanocomposites Controlled by Magnesium Ions. <i>ACS Appl. Mater. Interfaces</i> , 2021 <sup>[5]</sup> . | adopt a bioprocess-inspired room-temperature mineralization technique to synthesize a multilayered array of enamel-like columnar FAP/polymer nanocomposites | hardness of 2.42 GPa and Young's modulus of 81.5 GPa |

## Reference.

- [1] LIU R, XU X, CAI Y, et al. Preparation of calcite and aragonite complex layer materials inspired from biomineralization [J]. *Crystal Growth and Design*, 2009, 9(7): 3095-9.
- [2] CHEN Z, MIAO Z, ZHANG P, et al. Bioinspired enamel-like oriented minerals on general surfaces: towards improved mechanical properties [J]. *Journal of Materials Chemistry B*, 2019, 7(34): 5237-44.
- [3] ONUMA K, IJIMA M. Artificial enamel induced by phase transformation of amorphous nanoparticles [J]. *Scientific reports*, 2017, 7(1): 1-10.
- [4] XU Y, MA G, WANG X, et al. Solution-air interface synthesis and growth mechanism of tooth enamel-like hydroxyapatite/chondroitin sulfate films [J]. *Crystal growth & design*, 2012, 12(7): 3362-8.
- [5] LI Y, PING H, WEI J, et al. Bioprocess-Inspired Room-Temperature Synthesis of Enamel-like Fluorapatite/Polymer Nanocomposites Controlled by Magnesium Ions [J]. *ACS Applied Materials & Interfaces*, 2021, 13(21): 25260-9.
